# Supplementary material for: Average collision velocity of single yeast cells during electrochemically induced impacts
Source: Royal Society of Chemistry journal article supplement (doi:10.1039/d4an00134f), 2024-01-01
Supplement: d4an00134f1.pdf [file d4an00134f1.pdf]

### Electronic Supplementary Information for:

#### Average Collision Velocity of Single Yeast Cells during Electrochemically Induced Impacts

John A. Lutkenhaus,<sup>a</sup> Junaid U. Ahmed,<sup>b</sup> Mehedi Hasan,<sup>a</sup> Derek C. Prosser,<sup>c</sup> and Julio C. Alvarez<sup>a\*</sup>

<sup>a</sup>Chemistry Department, Virginia Commonwealth University, Richmond, VA, 23284.

<sup>b</sup>Chemistry Department, Khulna University of Engineering and Technology, Bangladesh.

<sup>c</sup>Biology Department, Virginia Commonwealth University, Richmond, VA, 23284.

Contents:

|                                                                                                                                                       | Page |
|-------------------------------------------------------------------------------------------------------------------------------------------------------|------|
| <b>Figure S1:</b> Microscopic image and diameter distribution of yeast cells                                                                          | S2   |
| <b>Figure S2:</b> Microscopic image of 12.5 $\mu\text{m}$ ultramicroelectrode (UME) and CVs of increasing ferrocyanide (FCN) and UME radius ( $r_e$ ) | S3   |
| <b>Figure S3:</b> Inner domain, outer domain, and particle meshing for finite element simulation                                                      | S4   |
| <b>Figure S4:</b> Cyclic voltammogram (CV) and $i$ - $t$ response of ferricyanide reduction                                                           | S5   |
| <b>Figure S5:</b> Simulated $\Delta i$ -values for increasing $r_e$ and cell radius ( $r_c$ )                                                         | S6   |
| <b>Figure S6:</b> Simulated geometric factor ( $F_g$ )-values for increasing $r_c/r_e$ ratio                                                          | S7   |
| <b>Figure S7:</b> Redox flux profiles with increasing FCN concentration and $r_e$                                                                     | S8   |
| <b>Figure S8:</b> Flux disruption by $r_c = 2 \mu\text{m}$ at UME $r_e = 12.5 \mu\text{m}$ with various angle                                         | S9   |
| <b>Table S1:</b> Simulated current vs experiment and analytical expression                                                                            | S10  |

Microscopic image and diameter distribution of yeast cells

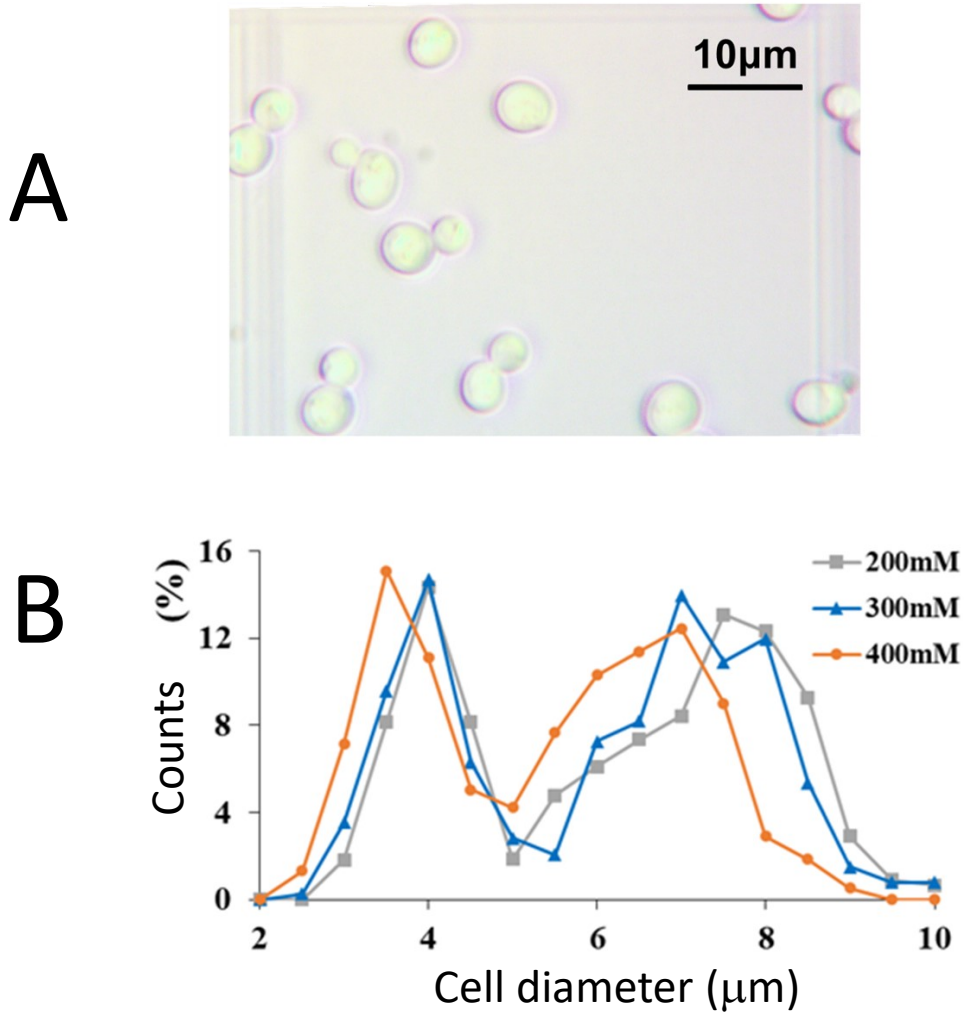

**Figure S1.** A) Microscopic image of yeast cells in solution of 100mM potassium chloride (KCl) and 400mM ferrocyanide (FCN). B) Size distribution of cells with increasing ferrocyanide FCN concentration.

Microscopic image of 12.5  $\mu\text{m}$  ultramicroelectrode (UME) and CVs of increasing ferrocyanide (FCN) and UME radius ( $r_e$ )

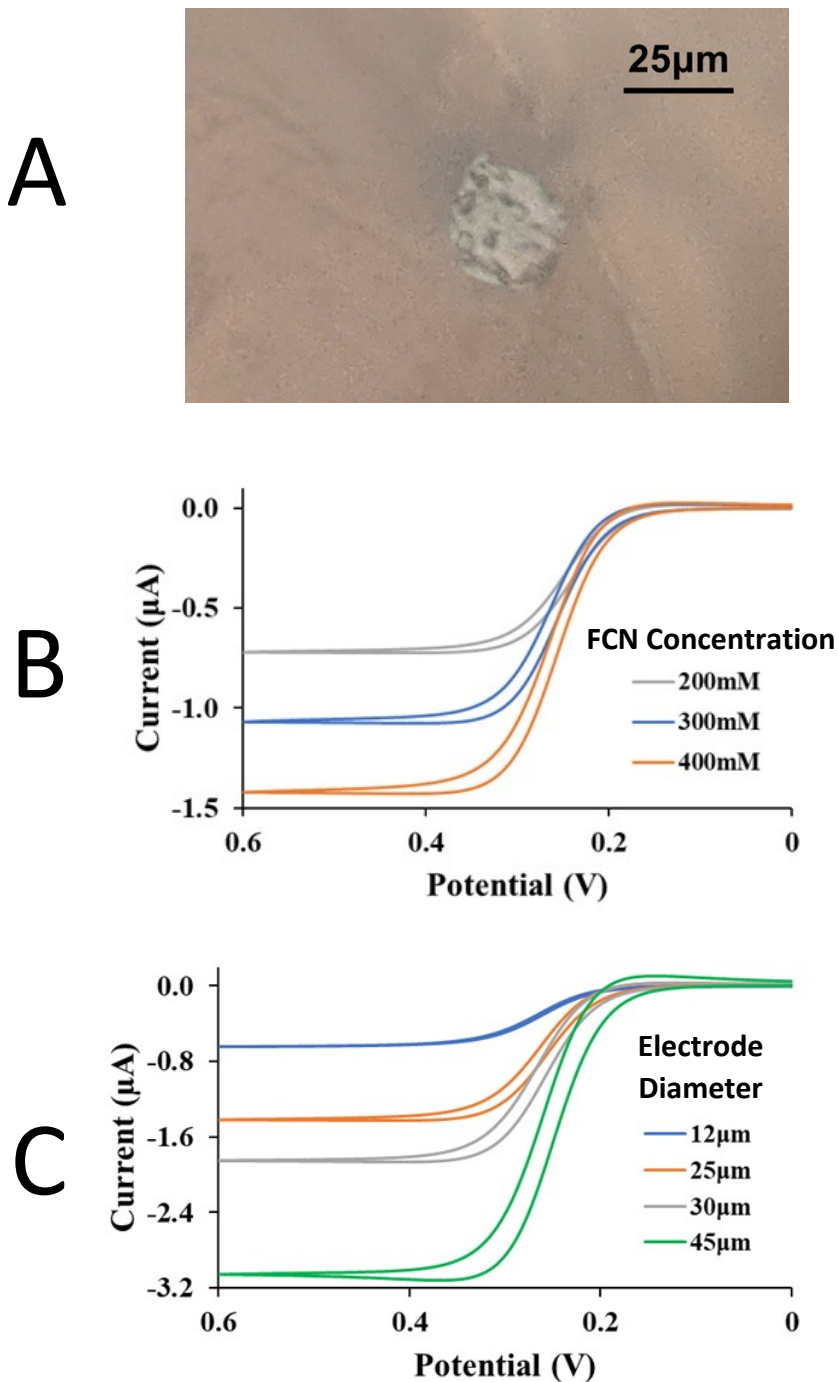

**Figure S2.** A) Microscopic image of platinum UME  $r_e = 12.5 \mu\text{m}$ . CV of B) 100mM KCl and UME  $r_e = 12.5 \mu\text{m}$  with increasing FCN concentration and C) 100mM KCl and 400mM FCN with increasing UME.

Inner domain, outer domain, and particle meshing for finite element simulation

## Domain

A

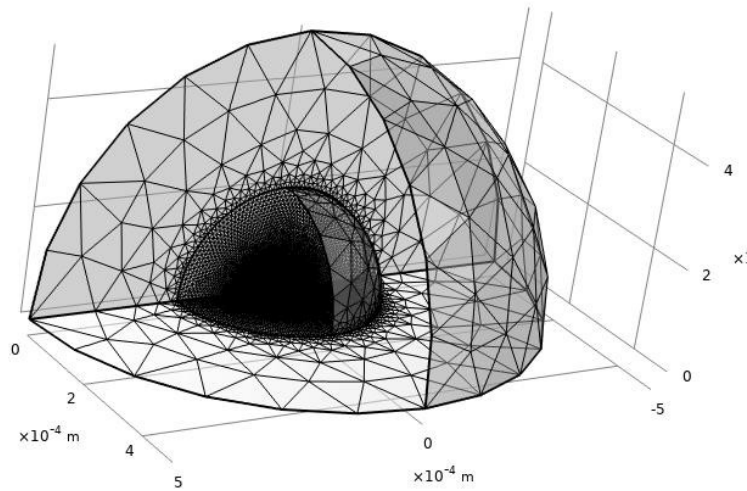

## Particle Generation

B

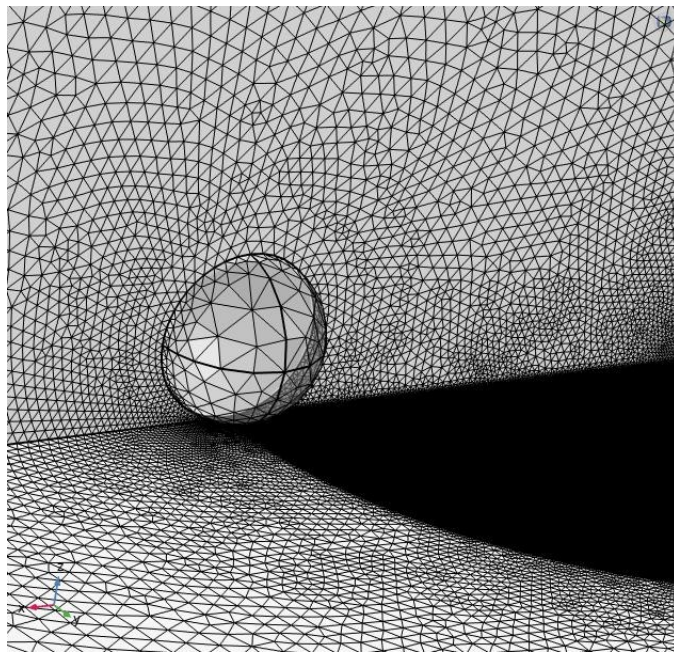

**Figure S3.** Meshing of A) 200  $\mu\text{m}$  radius inner domain and B) 500  $\mu\text{m}$  radius outer domain with 2  $\mu\text{m}$  radius insulating sphere on edge of UME  $r_e = 12.5 \mu\text{m}$ .

CV and *i-t* response of ferricyanide  $\text{Fe}(\text{CN})_6^{3/4+}$  reduction

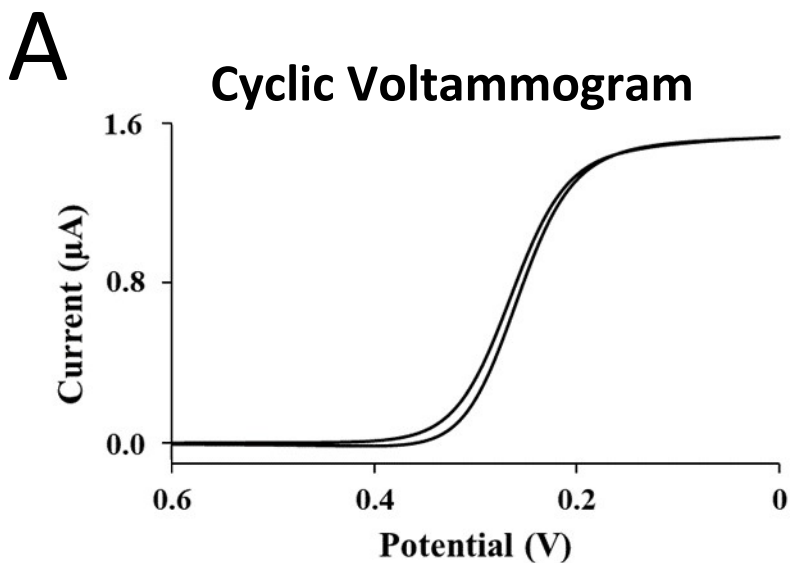

12.5 $\mu\text{m}$  UME      400mM  
100mM KCl      ferricyanide

**B**

***i-t* Plots**

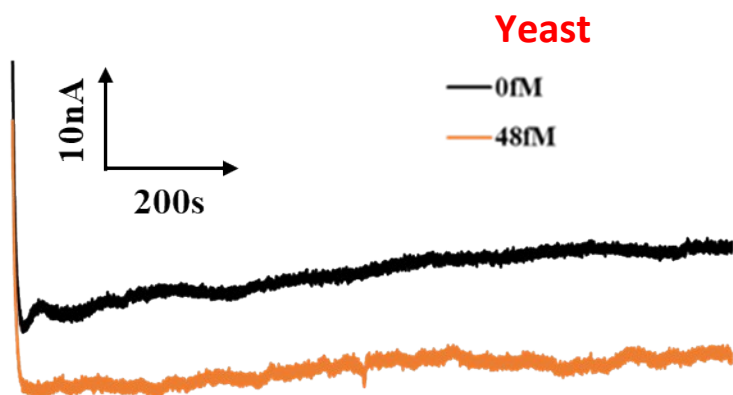

12.5 $\mu\text{m}$  UME      400mM ferricyanide  
100mM KCl      +0V vs Ag/AgCl

**Figure S4.** A) CV and B) *i-t* response with 0fM (black) and 48fM (orange) yeast cells. 100mM KCl and 400mM  $\text{FeCN}^+$  using UME  $r_e = 12.5 \mu\text{m}$ .

Simulated  $\Delta i$ -values for increasing  $r_e$  and cell radius ( $r_c$ )

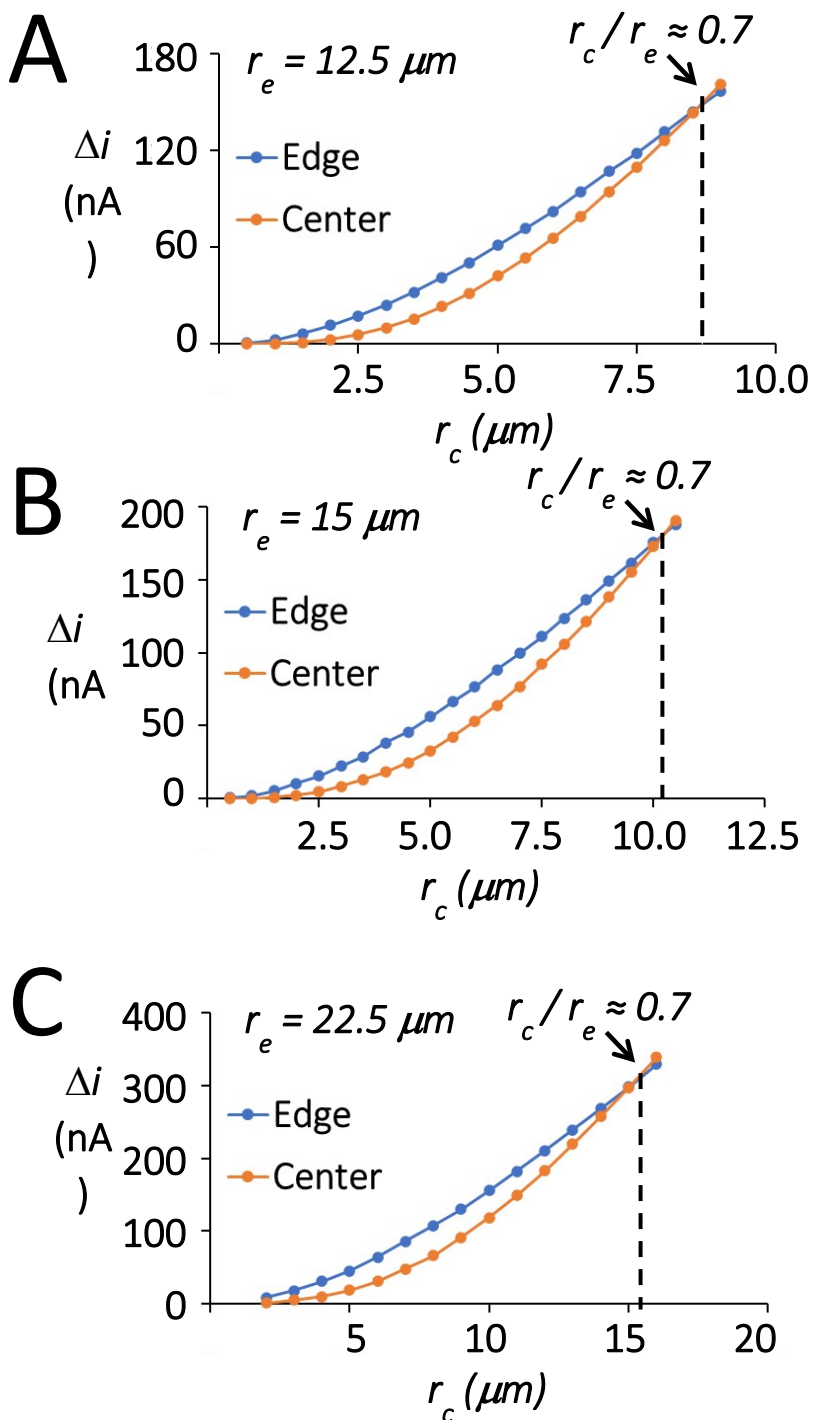

**Figure S5.** Simulated  $\Delta i$ -values (center and edge) for a UME  $r_e =$  A)  $12.5 \mu\text{m}$ , B)  $15 \mu\text{m}$ , and C)  $22.5 \mu\text{m}$ . Dashed line shows  $r_c$ -value at which both equalize.

Simulated geometric factor ( $F_g$ )-values for increasing  $r_c/r_e$  ratio

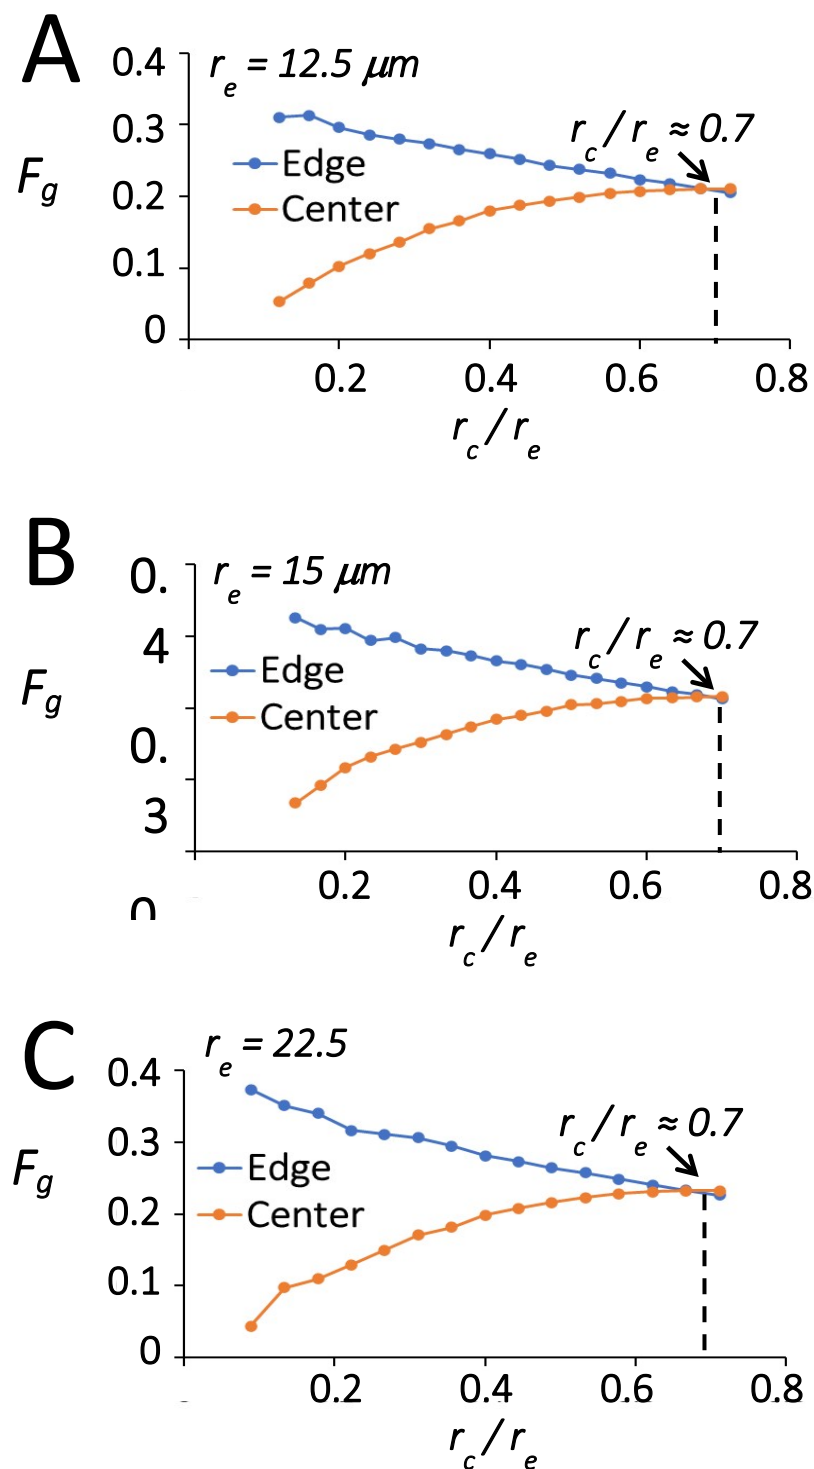

**Figure S6.** Simulated  $F_g$ -values (center and edge) for a UME  $r_e =$  A)  $12.5 \mu\text{m}$ , B)  $15 \mu\text{m}$ , C)  $22.5 \mu\text{m}$ .

Redox flux profiles with increasing FCN concentration and  $r_e$

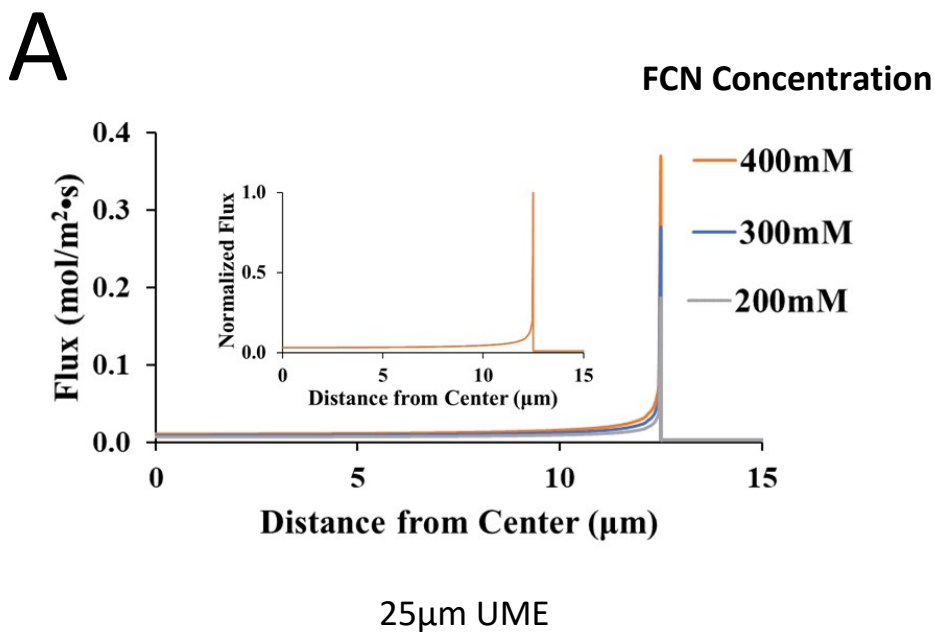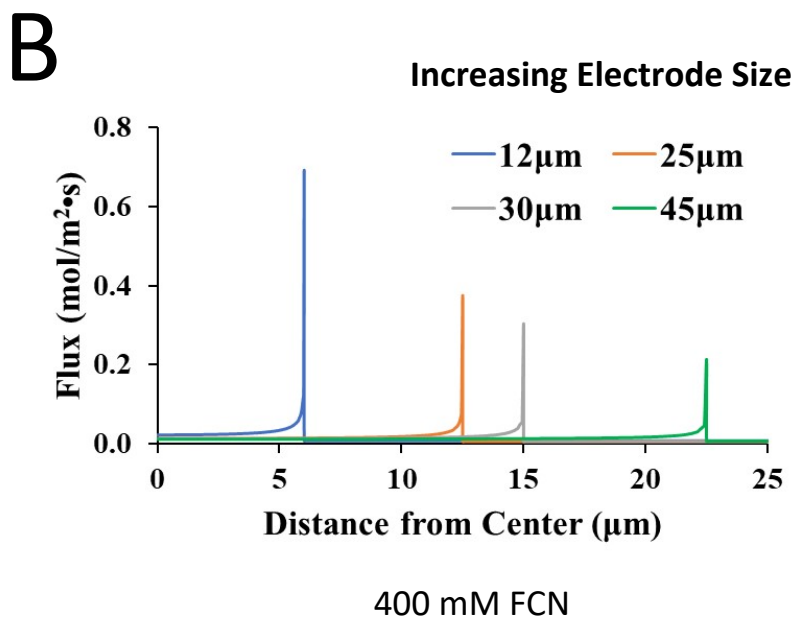

**Figure S7.** A) Redox flux along the radii of a UME  $r_e = 12.5 \mu\text{m}$  with increasing FCN concentration. B) Redox flux along the radii of increasing UME radius and 400 mM FCN.



Flux disruption by  $r_c = 2 \mu\text{m}$  at UME  $r_e = 12.5 \mu\text{m}$  with various angle

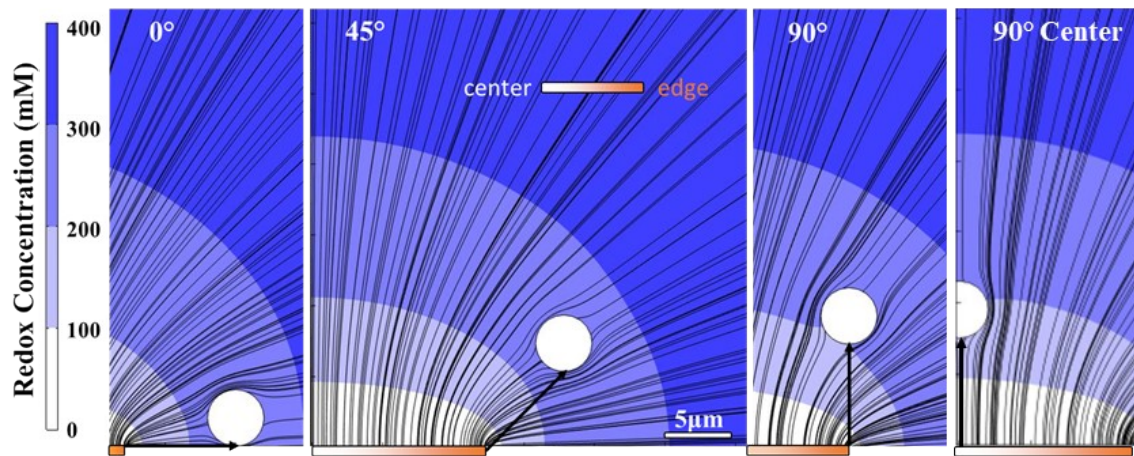

**Figure S8.** Simula  
 $2 \mu\text{m}$  radius cell at  
angle.

**Table S1 Simulated Current vs. Experiment and Analytical Expression**

% error of bare electrode currents ( $i_B$ ) from simulation respect to experiments and equation S1 at different values of  $C_{FCN}$  for  $r_e = 12.5 \mu\text{m}$ .

| $C_{FCN}$ (mM) | Simulation (nA) | Experimental (nA) | % Error | Eq. S2 (nA) | % Error |
|----------------|-----------------|-------------------|---------|-------------|---------|
| 200            | 736             | 723               | 1.8     | 646         | 13.9    |
| 300            | 1103            | 1070              | 3.1     | 970         | 13.7    |
| 400            | 1440            | 1420              | 1.4     | 1293        | 11.4    |

% error of bare electrode currents ( $i_B$ ) from simulation respect to experiments and equation S1 as a function of  $r_e$  ( $C_{FCN} = 400 \text{ mM}$ ).

| $r_e$ (mm) | Simulation (nA) | Experimental (nA) | % Error | Eq. S2 (nA) | % Error |
|------------|-----------------|-------------------|---------|-------------|---------|
| 6          | 666             | 645               | 3.3     | 621         | 7.2     |
| 12.5       | 1440            | 1420              | 1.4     | 1293        | 11.4    |
| 15         | 1804            | 1860              | 3.0     | 1551        | 16.3    |
| 22.5       | 2882            | 3060              | 5.8     | 2327        | 23.9    |

$$i_{ss} = 4nFD_{FCN}C_{FCN}r_e \quad (\text{S1})$$
